# Supplementary material for: Anti-Cancer Effects of Glaucarubinone in the Hepatocellular Carcinoma Cell Line Huh7 via Regulation of the Epithelial-To-Mesenchymal Transition-Associated Transcription Factor Twist1
Source: MDPI journal article supplement (doi:10.3390/ijms22041700), 2021-02-08
Supplement: s1 [file s1]

## Supplementary Information for

# Anti-Cancer Effects of Glaucarubinone in the Hepatocellular Carcinoma Cell Line Huh7 Via Regulation of the Epithelial-to-Mesenchymal Transition-Associated Transcription Factor Twist1

Jihye Seo<sup>1,†</sup>, Jain Ha<sup>1,†</sup>, Eunjeong Kang<sup>1</sup>, Haelim Yoon<sup>1</sup>, Sewoong Lee<sup>1</sup>, Shi Yong Ryu<sup>2</sup>, Kwonseop Kim<sup>3</sup>, and Sayeon Cho<sup>1,\*</sup>

<sup>1</sup> Laboratory of Molecular and Pharmacological Cell Biology, College of Pharmacy, Chung-Ang University, Seoul 06974, Korea; seojh0228@gmail.com (J.S.); joehalee@gmail.com (J.H.); ejaykang@gmail.com (E.K.); limtiny@naver.com (H.Y.); dltpdnd2000@naver.com (S.L.)

<sup>2</sup> Korea Research Institute of Chemical Technology (KRICT), Daejeon 34114, Korea; syryu@kRICT.re.kr

<sup>3</sup> College of Pharmacy and Research Institute for Drug Development, Chonnam National University, Gwangju 61186, Korea; koskim@jnu.ac.kr

\* Correspondence: sycho@cau.ac.kr

† These authors contributed equally to this work.

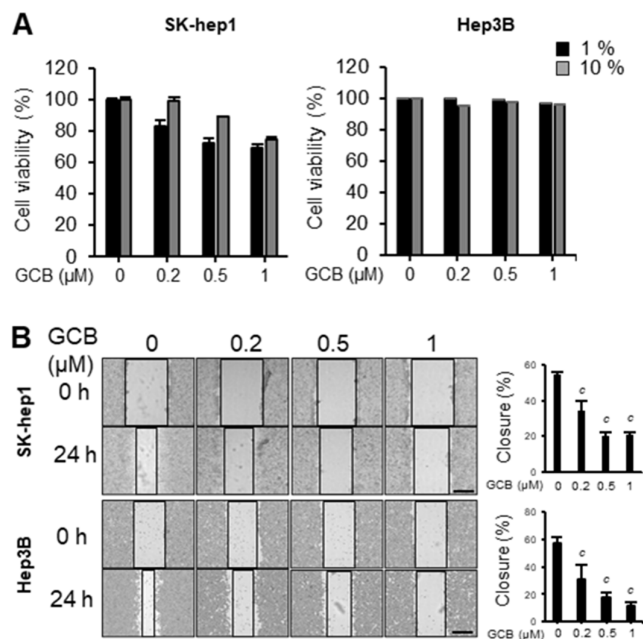

**Supplementary Figure S1.** Effects of GCB on other liver cancer cell lines. (A) SK-Hep1 and Hep3B cells were treated with GCB at the indicated concentration in cell culture medium containing 1% or 10% FBS for 24 h. The cell viability was measured using the EZ-CYTOX solution. The relative cell viability is shown using bar graphs in comparison with the untreated control (100%). Data are expressed as the mean  $\pm$  SEM. (B) SK-Hep1 and Hep3B cells were incubated with GCB (0, 0.2, 0.5, and 1  $\mu$ M). Microscopic images were taken at 24 h (scale bars, 0.5 mm). The wound closure values were quantified by measuring the percentage of wound closure in comparison with the 0 h point for each sample; the relative wound

closure is shown as a bar graph. Data were analyzed by one-way ANOVA;  $p < 0.001$  relative to the untreated control.

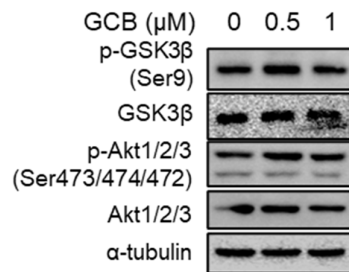

**Supplementary Figure S2.** Analysis of various intracellular signaling pathways. Huh7 cells treated with the indicated concentration of GCB were incubated for 24 h and then harvested. The protein samples were separated by SDS-PAGE, and the expression of other signaling pathways was evaluated using the indicated antibodies. This included p-Akt1/2/3 (Ser473/474/472), Akt1/2/3, p-GSK3 $\beta$  (Ser9), GSK3 $\beta$ , and  $\alpha$ -tubulin. p-Akt1/2/3 is used for detection of Ser473 phosphorylated Akt1 and correspondingly Ser474 phosphorylated Akt2 and correspondingly Ser472 phosphorylated Akt3.

**Supplementary Table S1.** List of primers used for qRT-PCR.

| Primer Name       | 5' to 3'                 |
|-------------------|--------------------------|
| <i>CDH1</i> (F)   | TACACTGCCAGGAGCCAGA      |
| <i>CDH1</i> (R)   | TGGCACCAGTGTCGGATTA      |
| <i>TWIST1</i> (F) | GGCTCAGCTACGCCTTCTC      |
| <i>TWIST1</i> (R) | CTCCTTCTCTGGAAACAATGACAT |
| <i>MMP2</i> (F)   | AGCGAGTGGATGCCGCCTTAA    |
| <i>MMP2</i> (R)   | CATTCCAGGCATCTGCGATGAG   |
| <i>MMP9</i> (F)   | GCCACTACTGTGCCTTGAGTC    |
| <i>MMP9</i> (R)   | CCCTCAGAGAATCGCCAGTACT   |
| <i>GAPDH</i> (F)  | GCTCTCTGCTCCTCCTGTC      |
| <i>GAPDH</i> (R)  | ACGACCAAATCCGTTGACTC     |
